# Supplementary material for: Prevalence and Sociodemographic Correlates of Unmet Need for Mental Health Counseling Among Adults During the COVID-19 Pandemic
Source: Atypon-hosted journal article supplement (doi:10.1176/appi.ps.202100111), 2021-06-30
Supplement: appi.ps.202100111.ds001.pdf [file appi.ps.202100111.ds001.pdf]

 


Psychiatry Online
