# Supplementary material for: Prevalence and Sociodemographic Correlates of Unmet Need for Mental Health Counseling Among Adults During the COVID-19 Pandemic
Source: Atypon-hosted journal article supplement (doi:10.1176/appi.ps.202100111), 2021-06-30
Supplement: appi.ps.202100111.ds001.pdf [file appi.ps.202100111.ds001.pdf]

Appendix A. Missing data for each variable in the analysis

|                                         | Missing | Percent missing |
|-----------------------------------------|---------|-----------------|
| N=69,944                                |         |                 |
| Age (per 10 years)                      | 0       | 0.0%            |
| Sex                                     | 0       | 0.0%            |
| Race/ethnicity                          | 0       | 0.0%            |
| Income below federal poverty line       | 15156   | 21.7%           |
| Education (high school or less)         | 0       | 0.0%            |
| No current health insurance             | 10692   | 15.3%           |
| Job loss during the pandemic            | 426     | 0.6%            |
| Unmet mental health need for counseling | 11346   | 16.2%           |
| Depressive/anxiety symptoms             | 10358   | 14.8%           |

Appendix B. Comparison of characteristics of participants with complete versus with missing data

|                                               | No missing data | Missing data  | p                   |
|-----------------------------------------------|-----------------|---------------|---------------------|
|                                               | 54,478          | 15,466        |                     |
| N=69,944                                      |                 |               |                     |
|                                               | Mean ± SD / %   | Mean ± SD / % |                     |
| Age                                           | 52.3 ± 0.7      | 49.5 ± 0.1    | <0.001 <sup>a</sup> |
| Sex                                           |                 |               | 0.163 <sup>b</sup>  |
| Male                                          | 40.1%           | 39.5%         |                     |
| Female                                        | 59.9%           | 60.5%         |                     |
| Race/ethnicity                                |                 |               | <0.001 <sup>b</sup> |
| White alone, not Hispanic                     | 78.0%           | 68.8%         |                     |
| Black alone, not Hispanic                     | 6.1%            | 9.8%          |                     |
| Asian alone, not Hispanic                     | 4.2%            | 5.2%          |                     |
| Two or more races + Other races, not Hispanic | 3.6%            | 3.8%          |                     |
| Hispanic or Latino (may be of any race)       | 8.2%            | 12.4%         |                     |
| Education (high school or less)               |                 |               | <0.001 <sup>b</sup> |
| High school or less                           | 12.0%           | 19.1%         |                     |
| More than high school                         | 88.0%           | 80.9%         |                     |

<sup>a</sup> Independent samples T-test

<sup>b</sup> Pearson's chi square test
